# Supplementary material for: Mutational optimization of the coelenterazine-dependent luciferase from Renilla
Source: PubMed Central journal article supplement (PMC2565673; doi:10.1186/1746-4811-4-23), 2008-09-30

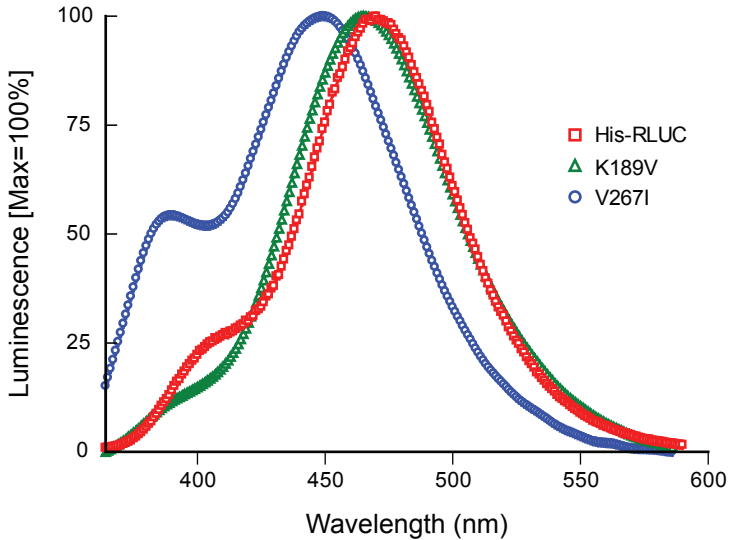

Supplement: 1746-4811-4-23-S1.pdf [file 1746-4811-4-23-S1.pdf]
